# Supplementary material for: Research on the spatial structure of desert tourism flow based on ecological digital footprints: a case study of Ningxia
Source: Frontiers journal article supplement (doi:10.3389/fenvs.2025.1544890), 2025-03-27
Supplement: Supplementary_file_1.docx [file Supplementary_file_1.docx]

import pprint

import time

from lxml import etree

import csv

import requests

with open('马蜂窝.csv', 'w', newline='', encoding='utf-8-sig') as csvfile:

fieldnames = ['标题', '发布时间', '正文']

writer = csv.DictWriter(csvfile, fieldnames=fieldnames)

writer.writeheader()

# 遍历每一页

for i in range(1, 11):

cookies = {

'mfw_uuid': '67b828ac-8078-040c-167d-29998bc29188',

'oad_n': 'a%3A3%3A%7Bs%3A3%3A%22oid%22%3Bi%3A1029%3Bs%3A2%3A%22dm%22%3Bs%3A15%3A%22www.mafengwo.cn%22%3Bs%3A2%3A%22ft%22%3Bs%3A19%3A%222025-02-21+15%3A18%3A04%22%3B%7D',

'__mfwa': '1740122285874.58494.1.1740122285874.1740122285874',

'__mfwlv': '1740122285',

'__mfwvn': '1',

'uva': 's%3A130%3A%22a%3A3%3A%7Bs%3A2%3A%22lt%22%3Bi%3A1740122285%3Bs%3A10%3A%22last_refer%22%3Bs%3A62%3A%22https%3A%2F%2Fwww.mafengwo.cn%2Ftravel-scenic-spot%2Fmafengwo%2F12931.html%22%3Bs%3A5%3A%22rhost%22%3BN%3B%7D%22%3B',

'__mfwurd': 'a%3A3%3A%7Bs%3A6%3A%22f_time%22%3Bi%3A1740122285%3Bs%3A9%3A%22f_rdomain%22%3Bs%3A15%3A%22www.mafengwo.cn%22%3Bs%3A6%3A%22f_host%22%3Bs%3A3%3A%22www%22%3B%7D',

'__mfwuuid': '67b828ac-8078-040c-167d-29998bc29188',

'bottom_ad_status': '0',

'PHPSESSID': 'trdk69mpe4prr60e8vei05ojd4',

'Hm_lvt_8288b2ed37e5bc9b4c9f7008798d2de0': '1740122286,1740123813',

'HMACCOUNT': 'D1D7F8ADA1F46996',

'__mfwothchid': 'referrer%7Copen.weixin.qq.com',

'__omc_chl': '',

'__mfwc': 'referrer%7Copen.weixin.qq.com',

'login': 'mafengwo',

'mafengwo': 'ca954a4754e88a50cd35d50921b19d76_71493921_67b831e59b47e1.95581597_67b831e59b4883.38857285',

'x-waf-captcha-referer': 'https%3A%2F%2Fwww.mafengwo.cn%2F',

'uol_throttle': '71493921',

'mfw_uid': '71493921',

'__omc_r': '',

'__mfwb': 'cd22471cc6ad.14.direct',

'__mfwlt': '1740124674',

'Hm_lpvt_8288b2ed37e5bc9b4c9f7008798d2de0': '1740124675',

'w_tsfp': 'ltvuV0MF2utBvS0Q7arolk+oHz0vcj04h0wpEaR0f5thQLErU5mB0Yd4us3+Nnbf5Mxnvd7DsZoyJTLYCJI3dwMWR8TFJYEQiV+ZxoRx3NtHBxdvEMiNXFQWcegn7mNBKXhCNxS00jA8eIUd379yilkMsyN1zap3TO14fstJ019E6KDQmI5uDW3HlFWQRzaLbjcMcuqPr6g18L5a5W2J4gn6LVp9A7lCgxaS1C5NWHl36Ra7fOhZYEr7Js/8SqA=',

}

headers = {

'User-Agent': 'Mozilla/5.0 (Windows NT 10.0; Win64; x64) AppleWebKit/537.36 (KHTML, like Gecko) Chrome/112.0.0.0 Safari/537.36 QuarkPC/2.0.7.222',

'Accept': 'application/json, text/javascript, */*; q=0.01',

'sec-ch-ua': '"Not:A-Brand";v="99", "Chromium";v="112"',

'x-requested-with': 'XMLHttpRequest',

'sec-ch-ua-mobile': '?0',

'sec-ch-ua-platform': '"Windows"',

'origin': 'https://www.mafengwo.cn',

'sec-fetch-site': 'same-origin',

'sec-fetch-mode': 'cors',

'sec-fetch-dest': 'empty',

'accept-language': 'zh-CN,zh;q=0.9',

'referer': 'https://www.mafengwo.cn/travel-scenic-spot/mafengwo/12931.html',

# Requests sorts cookies= alphabetically

# 'Cookie': 'mfw_uuid=67b828ac-8078-040c-167d-29998bc29188; oad_n=a%3A3%3A%7Bs%3A3%3A%22oid%22%3Bi%3A1029%3Bs%3A2%3A%22dm%22%3Bs%3A15%3A%22www.mafengwo.cn%22%3Bs%3A2%3A%22ft%22%3Bs%3A19%3A%222025-02-21+15%3A18%3A04%22%3B%7D; __mfwa=1740122285874.58494.1.1740122285874.1740122285874; __mfwlv=1740122285; __mfwvn=1; uva=s%3A130%3A%22a%3A3%3A%7Bs%3A2%3A%22lt%22%3Bi%3A1740122285%3Bs%3A10%3A%22last_refer%22%3Bs%3A62%3A%22https%3A%2F%2Fwww.mafengwo.cn%2Ftravel-scenic-spot%2Fmafengwo%2F12931.html%22%3Bs%3A5%3A%22rhost%22%3BN%3B%7D%22%3B; __mfwurd=a%3A3%3A%7Bs%3A6%3A%22f_time%22%3Bi%3A1740122285%3Bs%3A9%3A%22f_rdomain%22%3Bs%3A15%3A%22www.mafengwo.cn%22%3Bs%3A6%3A%22f_host%22%3Bs%3A3%3A%22www%22%3B%7D; __mfwuuid=67b828ac-8078-040c-167d-29998bc29188; bottom_ad_status=0; PHPSESSID=trdk69mpe4prr60e8vei05ojd4; Hm_lvt_8288b2ed37e5bc9b4c9f7008798d2de0=1740122286,1740123813; HMACCOUNT=D1D7F8ADA1F46996; __mfwothchid=referrer%7Copen.weixin.qq.com; __omc_chl=; __mfwc=referrer%7Copen.weixin.qq.com; login=mafengwo; mafengwo=ca954a4754e88a50cd35d50921b19d76_71493921_67b831e59b47e1.95581597_67b831e59b4883.38857285; x-waf-captcha-referer=https%3A%2F%2Fwww.mafengwo.cn%2F; uol_throttle=71493921; mfw_uid=71493921; __omc_r=; __mfwb=cd22471cc6ad.14.direct; __mfwlt=1740124674; Hm_lpvt_8288b2ed37e5bc9b4c9f7008798d2de0=1740124675; w_tsfp=ltvuV0MF2utBvS0Q7arolk+oHz0vcj04h0wpEaR0f5thQLErU5mB0Yd4us3+Nnbf5Mxnvd7DsZoyJTLYCJI3dwMWR8TFJYEQiV+ZxoRx3NtHBxdvEMiNXFQWcegn7mNBKXhCNxS00jA8eIUd379yilkMsyN1zap3TO14fstJ019E6KDQmI5uDW3HlFWQRzaLbjcMcuqPr6g18L5a5W2J4gn6LVp9A7lCgxaS1C5NWHl36Ra7fOhZYEr7Js/8SqA=',

}

params = {

'act': 'get_travellist',

}

data = {

'mddid': '12931',

'pageid': 'mdd_index',

'sort': '1',

'cost': '0',

'days': '0',

'month': '0',

'tagid': '0',

'page': i,

'_ts': int(time.time()*1000),

'_sn': '2bcfaf71b6',

}

response = requests.post('https://www.mafengwo.cn/gonglve/ajax.php', params=params, cookies=cookies, headers=headers, data=data,verify=False)

pprint.pprint(response.json()['list'])

tree = etree.HTML(response.json()['list'])

items = tree.xpath('//div[@class="tn-item clearfix"]')

for item in items:

link = item.xpath('.//a[@class="title-link"]/@href')[0]

title = item.xpath('.//a[@class="title-link"]/text()')[0].strip()

print(title)

# views = item.xpath('.//span[@class="tn-nums"]/text()[1]')[0].strip()

# time = item.xpath('.//span[contains(@class, "time")]/text()')

link = 'https://www.mafengwo.cn'+link

cookies = {

'HMACCOUNT': '865B3F58A82B3078',

'Hm_lpvt_8288b2ed37e5bc9b4c9f7008798d2de0': '1740122951',

'Hm_lvt_8288b2ed37e5bc9b4c9f7008798d2de0': '1740122490',

'PHPSESSID': 'ntmsg9tvn8c0smr00hanpcg5u5',

'__mfwa': '1740122489766.56087.1.1740122489766.1740122489766',

'__mfwb': '4935ad5c6f53.4.direct',

'__mfwc': 'direct',

'__mfwlt': '1740122950',

'__mfwlv': '1740122489',

'__mfwurd': 'a%3A3%3A%7Bs%3A6%3A%22f_time%22%3Bi%3A1740122489%3Bs%3A9%3A%22f_rdomain%22%3Bs%3A15%3A%22www.mafengwo.cn%22%3Bs%3A6%3A%22f_host%22%3Bs%3A3%3A%22www%22%3B%7D',

'__mfwuuid': '67b82978-3517-8111-040d-1a70122e39ce',

'__mfwvn': '1',

'bottom_ad_status': '0',

'mfw_uuid': '67b82978-3517-8111-040d-1a70122e39ce',

'oad_n': 'a%3A3%3A%7Bs%3A3%3A%22oid%22%3Bi%3A1029%3Bs%3A2%3A%22dm%22%3Bs%3A15%3A%22www.mafengwo.cn%22%3Bs%3A2%3A%22ft%22%3Bs%3A19%3A%222025-02-21+15%3A21%3A28%22%3B%7D',

'uva': 's%3A130%3A%22a%3A3%3A%7Bs%3A2%3A%22lt%22%3Bi%3A1740122489%3Bs%3A10%3A%22last_refer%22%3Bs%3A62%3A%22https%3A%2F%2Fwww.mafengwo.cn%2Ftravel-scenic-spot%2Fmafengwo%2F12931.html%22%3Bs%3A5%3A%22rhost%22%3BN%3B%7D%22%3B',

'w_tsfp': 'ltvuV0MF2utBvS0Q7arolkmnEToucT84h0wpEaR0f5thQLErU5mB0Yd4vMLwM3Xe5sxnvd7DsZoyJTLYCJI3dwNHFpqSJokV2guXloUm3dhFVEUxFZnYXQRNI+995WJHKnhCNxS00jA8eIUd379yilkMsyN1zap3TO14fstJ019E6KDQmI5uDW3HlFWQRzaLbjcMcuqPr6g18L5a5W3csFLzLV0nVr5GgxSS1yweXHtysBO6J+BdM0+scZynSqA=',

}

headers = {

'User-Agent': 'Mozilla/5.0 (Windows NT 10.0; Win64; x64) AppleWebKit/537.36 (KHTML, like Gecko) Chrome/121.0.0.0 Safari/537.36',

'Accept': 'application/json, text/javascript, */*; q=0.01',

# 'Accept-Encoding': 'gzip, deflate',

'sec-ch-ua': '"Not A(Brand";v="99", "Google Chrome";v="121", "Chromium";v="121"',

'x-requested-with': 'XMLHttpRequest',

'sec-ch-ua-mobile': '?0',

'sec-ch-ua-platform': '"Windows"',

'origin': 'https://www.mafengwo.cn',

'sec-fetch-site': 'same-origin',

'sec-fetch-mode': 'cors',

'sec-fetch-dest': 'empty',

'referer': 'https://www.mafengwo.cn/travel-scenic-spot/mafengwo/12931.html',

'accept-language': 'zh-CN,zh;q=0.9',

# Requests sorts cookies= alphabetically

# 'Cookie': 'HMACCOUNT=865B3F58A82B3078; Hm_lpvt_8288b2ed37e5bc9b4c9f7008798d2de0=1740122951; Hm_lvt_8288b2ed37e5bc9b4c9f7008798d2de0=1740122490; PHPSESSID=ntmsg9tvn8c0smr00hanpcg5u5; __mfwa=1740122489766.56087.1.1740122489766.1740122489766; __mfwb=4935ad5c6f53.4.direct; __mfwc=direct; __mfwlt=1740122950; __mfwlv=1740122489; __mfwurd=a%3A3%3A%7Bs%3A6%3A%22f_time%22%3Bi%3A1740122489%3Bs%3A9%3A%22f_rdomain%22%3Bs%3A15%3A%22www.mafengwo.cn%22%3Bs%3A6%3A%22f_host%22%3Bs%3A3%3A%22www%22%3B%7D; __mfwuuid=67b82978-3517-8111-040d-1a70122e39ce; __mfwvn=1; bottom_ad_status=0; mfw_uuid=67b82978-3517-8111-040d-1a70122e39ce; oad_n=a%3A3%3A%7Bs%3A3%3A%22oid%22%3Bi%3A1029%3Bs%3A2%3A%22dm%22%3Bs%3A15%3A%22www.mafengwo.cn%22%3Bs%3A2%3A%22ft%22%3Bs%3A19%3A%222025-02-21+15%3A21%3A28%22%3B%7D; uva=s%3A130%3A%22a%3A3%3A%7Bs%3A2%3A%22lt%22%3Bi%3A1740122489%3Bs%3A10%3A%22last_refer%22%3Bs%3A62%3A%22https%3A%2F%2Fwww.mafengwo.cn%2Ftravel-scenic-spot%2Fmafengwo%2F12931.html%22%3Bs%3A5%3A%22rhost%22%3BN%3B%7D%22%3B; w_tsfp=ltvuV0MF2utBvS0Q7arolkmnEToucT84h0wpEaR0f5thQLErU5mB0Yd4vMLwM3Xe5sxnvd7DsZoyJTLYCJI3dwNHFpqSJokV2guXloUm3dhFVEUxFZnYXQRNI+995WJHKnhCNxS00jA8eIUd379yilkMsyN1zap3TO14fstJ019E6KDQmI5uDW3HlFWQRzaLbjcMcuqPr6g18L5a5W3csFLzLV0nVr5GgxSS1yweXHtysBO6J+BdM0+scZynSqA=',

}

res = requests.get(link,cookies=cookies,headers=headers,verify=False)

# print(res.text)

tree = etree.HTML(res.text)

times = tree.xpath('//li[@class="time"]/text()[2]')

ptext = tree.xpath('//div[@class="content"]//p/text()')

text = ''.join(ptext).replace('\xa0', '').replace('\n', '').replace('\r', '').strip()

# 写入CSV

dit = {'标题': title, '发布时间': times, '正文': text}

print(dit)

writer.writerow(dit)

import time

import requests

from lxml import etree

import csv

cookies = {

'QN205': 'organic',

'QN277': 'organic',

'QN48': 'tc_864b73104c95f701_195273d7c65_8d4a',

'QN269': 'E54C6954F01E11EF8B5E36FFA2C56A45',

'QN1': '00013a8034fc6b76e19864ce',

'qunar-assist': '{%22version%22:%2220211215173359.925%22%2C%22show%22:false%2C%22audio%22:false%2C%22speed%22:%22middle%22%2C%22zomm%22:1%2C%22cursor%22:false%2C%22pointer%22:false%2C%22bigtext%22:false%2C%22overead%22:false%2C%22readscreen%22:false%2C%22theme%22:%22default%22}',

'csrfToken': 'HFuwyHRmCmQpVrIQ2ZDlfqovAVK1zMiB',

'QN300': 'common.qunarzz.com',

'_i': 'DFiEZnT0sZvw1b_e_fiAVRLHoLyw',

'_vi': '2eFz_wcXmOlaxT_QMqkSoRq_y7u40w977IHi1E6KZyPgvWQ3N59F91m7ZUYvdV-NBcozxM__jMiklkzxU-NicslKMtP8Cube5XeSQaWjrrSojBc5nEzt9AllgWTb8zXnzOQEXyDiBkSMi7yq9JwWaGmP0DwdIg0IN-2JPZcF3XU8',

'ariaDefaultTheme': 'null',

'Hm_lvt_c56a2b5278263aa647778d304009eafc': '1740120096,1740133950',

'HMACCOUNT': '8179753F80C7F3D3',

'fid': 'f78d4e03-8c9c-4f56-9fc1-7a4d95cf981e',

'viewdist': '300079-1',

'uld': '1-300079-1-1740133953',

'viewbook': '6953157|7748813|7748813|7748813|7487190',

'JSESSIONID': 'CBA84FA384E2D16CF67F910898D7CD94',

'QN271': '65c9535d-fd9c-4bdb-872b-7a26834b2b76',

'QN267': '12710563478992fd83',

'Hm_lpvt_c56a2b5278263aa647778d304009eafc': '1740133968',

}

headers = {

'accept': 'text/html,application/xhtml+xml,application/xml;q=0.9,image/avif,image/webp,image/apng,*/*;q=0.8,application/signed-exchange;v=b3;q=0.7',

'accept-language': 'zh-CN,zh;q=0.9,en;q=0.8,en-GB;q=0.7,en-US;q=0.6',

'cache-control': 'max-age=0',

'priority': 'u=0, i',

'referer': 'https://travel.qunar.com/',

'sec-ch-ua': '"Not(A:Brand";v="99", "Microsoft Edge";v="133", "Chromium";v="133"',

'sec-ch-ua-mobile': '?0',

'sec-ch-ua-platform': '"Windows"',

'sec-fetch-dest': 'document',

'sec-fetch-mode': 'navigate',

'sec-fetch-site': 'same-origin',

'sec-fetch-user': '?1',

'upgrade-insecure-requests': '1',

'user-agent': 'Mozilla/5.0 (Windows NT 10.0; Win64; x64) AppleWebKit/537.36 (KHTML, like Gecko) Chrome/133.0.0.0 Safari/537.36 Edg/133.0.0.0',

}

with open('去哪.csv', 'w', newline='', encoding='utf-8-sig') as csvfile:

fieldnames = ['标题', '发布时间', '正文']

writer = csv.DictWriter(csvfile, fieldnames=fieldnames)

writer.writeheader()

# 遍历每一页

for i in range(1, 50):

url = f'https://travel.qunar.com/travelbook/list/23-ningxia-298293/hot_heat/{i}.htm'

try:

response = requests.get(url, cookies=cookies, headers=headers)

time.sleep(2)

tree = etree.HTML(response.text)

print(f"正在处理：{url}")

# 获取每个文章的链接

li_list = tree.xpath('//ul[@class="b_strategy_list "]/li')

for li in li_list:

try:

title = li.xpath('./h2/a/text()')[0].strip() # 获取标题

ahref = li.xpath('./h2/a/@href')[0].split('/')[2]

ahref = 'https://travel.qunar.com/travelbook/note/' + ahref

print(f"找到文章：{title} - {ahref}")

# 请求文章详情页

res = requests.get(ahref, cookies=cookies, headers=headers)

tree = etree.HTML(res.text)

try:

# 提取发布时间

times = tree.xpath('//*[@id="js_mainleft"]/div[2]/ul/li[1]/p/span[2]/text()')[0].strip()

except:

times = '无日期'

try:

# 提取正文内容

text = tree.xpath('/html/body//div[@class="b_panel_schedule"]//p//text()')

text = ''.join(text).replace('\xa0', '').replace('\n', '').replace('\r', '').strip()

except:

text = '无内容'

# 保存数据

dit = {'标题': title, '发布时间': times, '正文': text}

print(dit)

writer.writerow(dit)

except Exception as e:

print(f"处理文章时出错：{e}")

continue # 跳过当前文章，继续处理下一个

except Exception as e:

print(f"处理第 {i} 页时出错：{e}")

continue # 跳过当前页面，继续处理下一页

print("抓取完成！")

ï»¿

import requests

from lxml import etree

import csv

# å®šä¹‰è¯·æ±‚å¤´å’ŒCookie

headers = {

'authority': 'you.ctrip.com',

'accept': 'text/html,application/xhtml+xml,application/xml;q=0.9,image/avif,image/webp,image/apng,*/*;q=0.8,application/signed-exchange;v=b3;q=0.7',

'accept-language': 'zh-CN,zh;q=0.9',

'referer': 'https://you.ctrip.com/travels/ningxia100063/t3-p3.html',

'sec-ch-ua': '"Not:A-Brand";v="99", "Chromium";v="112"',

'sec-ch-ua-mobile': '?0',

'sec-ch-ua-platform': '"Windows"',

'sec-fetch-dest': 'document',

'sec-fetch-mode': 'navigate',

'sec-fetch-site': 'same-origin',

'sec-fetch-user': '?1',

'upgrade-insecure-requests': '1',

'user-agent': 'Mozilla/5.0 (Windows NT 10.0; Win64; x64) AppleWebKit/537.36 (KHTML, like Gecko) Chrome/112.0.0.0 Safari/537.36 QuarkPC/2.0.7.222',

'x-uctiming-46938875': '1740111608630',

}

cookies = {

'GUID': '09031042116374938740',

'nfes_isSupportWebP': '1',

'nfes_isSupportWebP': '1',

'UBT_VID': '1739436692970.debePwHkpldX',

'MKT_CKID': '1739436696409.0u8jf.75s7',

'_RSG': 'Bz4Z6rTUNYEFIxstuRSN69',

'_RDG': '2887d7cc08b249256e01eb91092e3c7aa8',

'_RGUID': 'e89779dd-468c-4f4b-9197-71be37dbb48f',

'_bfaStatusPVSend': '1',

'Hm_lvt_e4211314613fcf074540918eb10eeecb': '1739436693,1740110042',

'HMACCOUNT': 'D1D7F8ADA1F46996',

'ASP.NET_SessionSvc': 'MTAuNjEuMjIuMjUxfDkwOTB8amlucWlhb3xkZWZhdWx0fDE3MDUwMzE4MzY0NjQ',

'_RF1': '222.89.92.90',

'_ubtstatus': '%7B%22vid%22%3A%221739436692970.debePwHkpldX%22%2C%22sid%22%3A2%2C%22pvid%22%3A9%2C%22pid%22%3A290570%7D',

'_bfi': 'p1%3D290570%26p2%3D290570%26v1%3D9%26v2%3D7',

'_bfaStatus': 'success',

'_pd': '%7B%22_o%22%3A33%2C%22s%22%3A224%2C%22_s%22%3A4%7D',

'Hm_lpvt_e4211314613fcf074540918eb10eeecb': '1740111561',

'Hm_lvt_a8d6737197d542432f4ff4abc6e06384': '1740111574',

'Hm_lpvt_a8d6737197d542432f4ff4abc6e06384': '1740111574',

'HMACCOUNT': 'D1D7F8ADA1F46996',

'_bfa': '1.1739436692970.debePwHkpldX.1.1740111571781.1740111573947.2.12.102001',

'_ga': 'GA1.1.381522301.1740111575',

'_ga_9BZF483VNQ': 'GS1.1.1740111575.1.0.1740111575.0.0.0',

'_ga_5DVRDQD429': 'GS1.1.1740111575.1.0.1740111576.0.0.0',

'_ga_B77BES1Z8Z': 'GS1.1.1740111575.1.0.1740111576.59.0.0',

'_jzqco': '%7C%7C%7C%7C1740110051002%7C1.1022539780.1739436696415.1740111570726.1740111578066.1740111570726.1740111578066.undefined.0.0.12.12',

'MKT_Pagesource': 'PC',

}

# æ‰“å¼€CSVæ–‡ä»¶å¹¶åˆå§‹åŒ–writer

with open('æºç¨‹.csv', 'w', newline='', encoding='utf-8-sig') as csvfile:

fieldnames = ['æ ‡é¢˜', 'å‘å¸ƒæ—¶é—´', 'æ­£æ–‡']

writer = csv.DictWriter(csvfile, fieldnames=fieldnames)

writer.writeheader()

# éåŽ†æ¯ä¸€é¡µ

for i in range(1, 11):

url = f'https://you.ctrip.com/travels/ningxia100063/t3-p{i}.html'

response = requests.get(url, cookies=cookies, headers=headers)

tree = etree.HTML(response.text)

# èŽ·å–æ¯ä¸ªæ–‡ç« çš„é“¾æŽ¥

articles = tree.xpath('//*[@id="content"]/div[4]/div/div[2]/div/div[2]/a')

for article in articles:

title = article.xpath('.//div/dl/dt/text()')[0]

times = article.xpath('.//div/dl/dd[1]/text()')[0].replace('\xa0', '').strip()

ahref = article.attrib['href']

ahref = 'https://you.ctrip.com' + ahref

# è¯·æ±‚æ–‡ç« è¯¦æƒ…é¡µ

res = requests.get(ahref, cookies=cookies, headers=headers)

tree = etree.HTML(res.text)

# æå–æ–‡ç« æ­£æ–‡

ptext = tree.xpath('//div[@class="ctd_content"]//p/text()')

text = ''.join(ptext).replace('\xa0', '').replace('\n', '').replace('\r', '').strip()

# å†™å…¥CSV

dit = {'æ ‡é¢˜': title, 'å‘å¸ƒæ—¶é—´': times, 'æ­£æ–‡': text}

print(dit)

writer.writerow(dit)
